# Supplementary material for: The monothiol glutaredoxin Grx4 influences thermotolerance, cell wall integrity, and Mpk1 signaling in Cryptococcus neoformans
Source: PubMed Central journal article supplement (PMC8527476; doi:10.1093/g3journal/jkab322), 2021-09-07
Supplement: jkab322_supplementary_data.pdf [file jkab322_supplementary_data.pdf]

Supplemental Table S1. Primers used to generate mutants and tagging strains

| Primer sequence (5' – 3')                               | Primer name    |
|---------------------------------------------------------|----------------|
| TCGGGCTACGTTTGGAATTAGCCTCTCCT                           | Cna1-del-P1    |
| GCCTCTGCGTCTTCGCCCACTCCTACCACCAGGTTTATCTGTATTAACACGGAAG | Cna1-del-P2    |
| CTTCCGTGTTAATACAGATAAACCTGGTGGTAGGAGTGGGCGAAGACGCAGAGGC | Cna1-del-P3    |
| CCAGCTCACATCCTCGCAGCGAGTAGATGCTGGTTTCGAACGATGGA         | Cna1-del-P4    |
| TCCATCGTTCGAAACCAGCATCTACTCGCTGCGAGGATGTGAGCTGG         | Cna1-del-P5    |
| CAAGACCCTGGCTACTGTTGTAACCTTACCCT                        | Cna1-del-P6    |
| GGCAGAACTGACATGCGACACAGA                                | Cna1-del-P7-NE |
| GAGATAACGAGTATCTGCCGGAT                                 | Cna1-del-P8-NE |
| CTCCCAATCTGCTGGATGACATCT                                | Cna1-del-P9-PO |
| TGTCTGGGAGTCTTTCTGGATTGGAGT                             | Cna1-P10-PO    |
| TGCCGATTGCGAGCTCAAGATTTGTGATT                           | Mpk1-Flag-P1F  |
| GCTGTGGTCCAAGTCTGATAATAGATCTAGACA                       | Mpk1-Flag-P3R  |

Supplemental Table S2. Primers used in qRT-PCR

| Primer sequence (5' – 3') | Primer name |
|---------------------------|-------------|
| GTATCCTAACGCATCTCCCTTG    | Mpk1For     |
| GGAAACTTCTGACCTCTTCGAG    | Mpk1Rev     |
| AACAGGTCTGTGATGCCCTTAGA   | 18sFor      |
| ACTCGCTGGCTCAGTCAGTGT     | 18sRev      |
| CCCACTGTCCCATTTACGA       | ACT1For     |
| CAGCAAGATCGATACGGAGGAT    | ACT1Rev     |
